# Supplementary material for: Mechanism of Ni N-heterocyclic carbene catalyst for C–O bond hydrogenolysis of diphenyl ether: a density functional study
Source: Royal Society of Chemistry journal article supplement (doi:10.1039/c4dt02374a), 2014-01-01
Supplement: c4dt02374a1.pdf [file c4dt02374a1.pdf]

## Supplementary Information

### Mechanisms of Ni *N*-Heterocyclic Carbene Catalysts for C-O Bond Hydrogenolysis of Diphenyl Ether: A Density Functional Study

*Boodsarin Sawatlon,<sup>‡a</sup> Taveechai Wititsuwannakul,<sup>‡a</sup> Yuthana Tantirungrotechai,<sup>c</sup> and Panida Surawatanawong,<sup>\*,a,b</sup>*

<sup>a</sup>Department of Chemistry and Center of Excellence for Innovation in Chemistry, Faculty of Science, Mahidol University, 272 Rama VI Road, Ratchathewi, Bangkok 10400, Thailand.

<sup>b</sup>Center for Alternative Energy, Mahidol University, 999 Phuttamonthon 4 Road, Salaya, Nakhon Pathom 73170, Thailand.

<sup>c</sup>Department of Chemistry, Faculty of Science, Thammasat University, Thailand

<sup>‡</sup>These authors contributed equally to this work.

\*E-mail: [panida.sur@mahidol.ac.th](mailto:panida.sur@mahidol.ac.th)

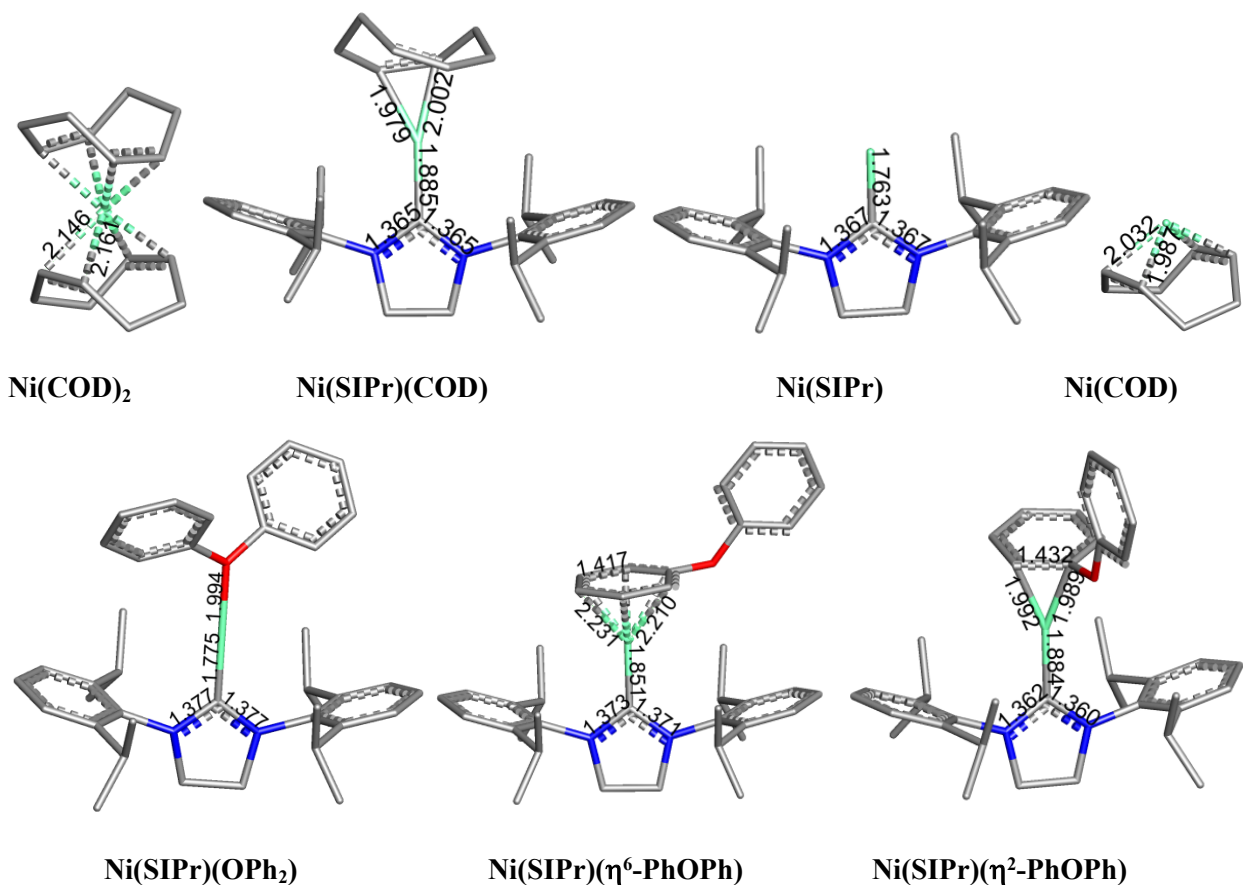

**Fig. S1** Optimized structures in the formation of  $\text{Ni(SIPr)(}\eta^2\text{-PhOPh)}$  from the  $\text{Ni(COD)}_2$  precursor. All hydrogen atoms are omitted for clarity. Calculated bond distances are shown in Å. Ni atoms are shown in green, C atoms in grey, O atoms in red, and N atoms in blue.

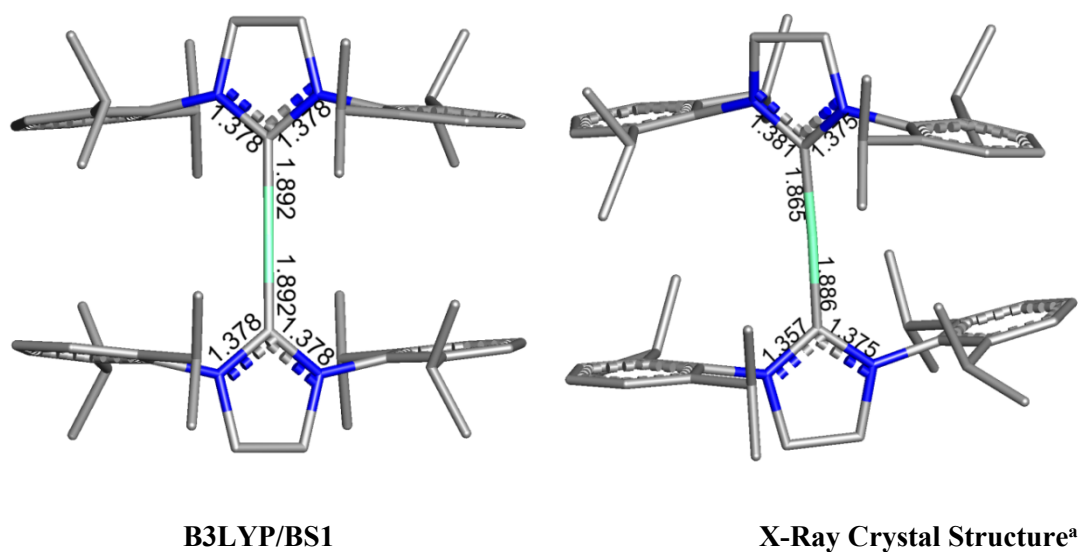

**Fig. S2** Calculated structure and X-ray crystal structure<sup>a</sup> of  $\text{Ni(SIPr)}_2$ . Calculated bond distances are shown in Å. All hydrogen atoms are omitted for clarity.

<sup>a</sup>A. A. Danopoulos and D. Pugh, *Dalton Trans.*, 2008, 30-31.

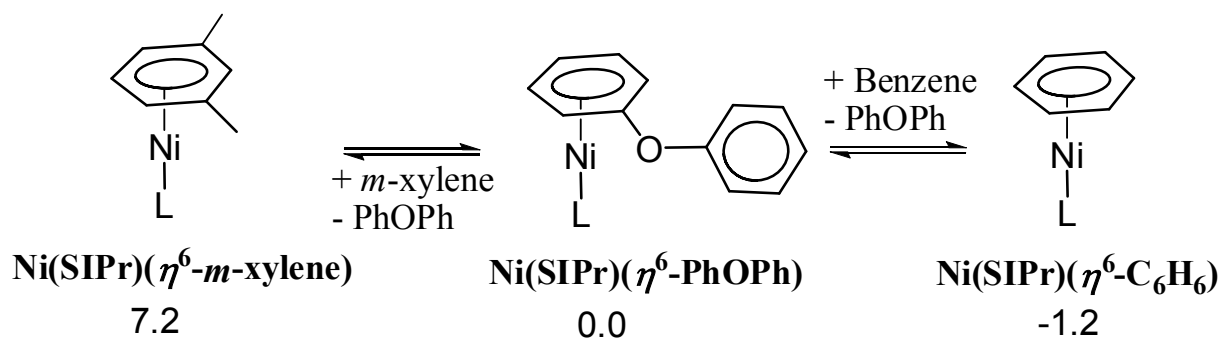

**Fig. S3** Ligand substitution reaction of  $\text{Ni}(\text{SIPr})(\eta^6\text{-PhOPh})$ . Solvent corrected free energies relative to  $\text{Ni}(\text{SIPr})(\eta^6\text{-PhOPh})$  in *m*-xylene are given in kcal/mol.

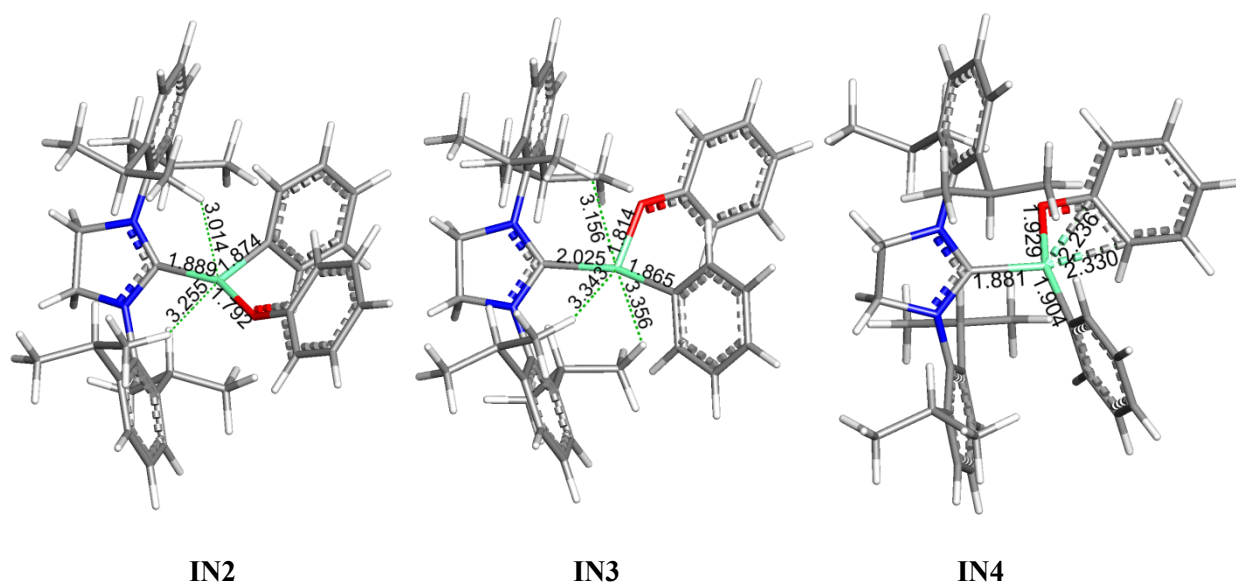

**Fig. S4** Optimized geometries of  $[\text{Ni}(\text{SIPr})(\text{Ph})(\text{OPh})]^0$ : **IN2**, **IN3**, and **IN4**. Calculated bond distances are shown in Å.

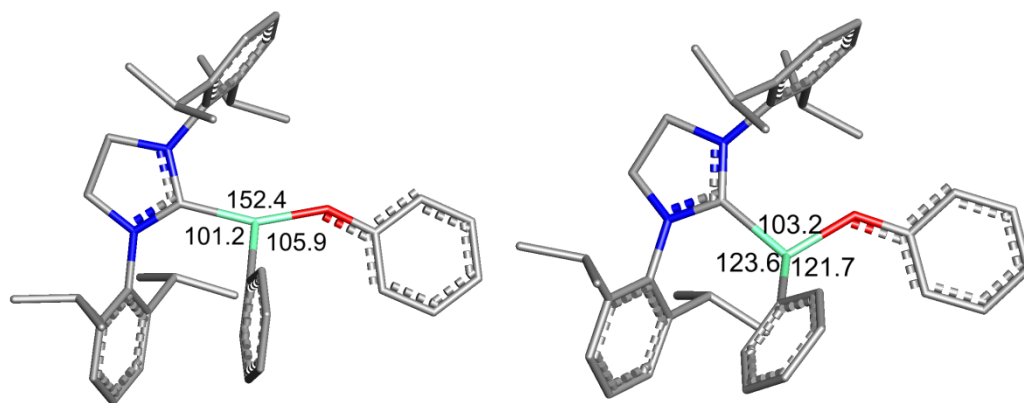

**IN2**

**IN2<sub>T</sub>**

Spin state

Singlet

Triplet

Relative free energy

0.0

2.8

**Fig. S5** Optimized geometries of  $[\text{Ni}^{\text{II}}(\text{SIPr})(\text{Ph})(\text{OPh})]^0$  in the singlet (**IN2**) and in the triplet state (**IN2<sub>T</sub>**). All H atoms are omitted for clarity. Selected bond angles are shown in degree ( $^{\circ}$ ). Relative solvent corrected free energies in *m*-xylene are given in kcal/mol.

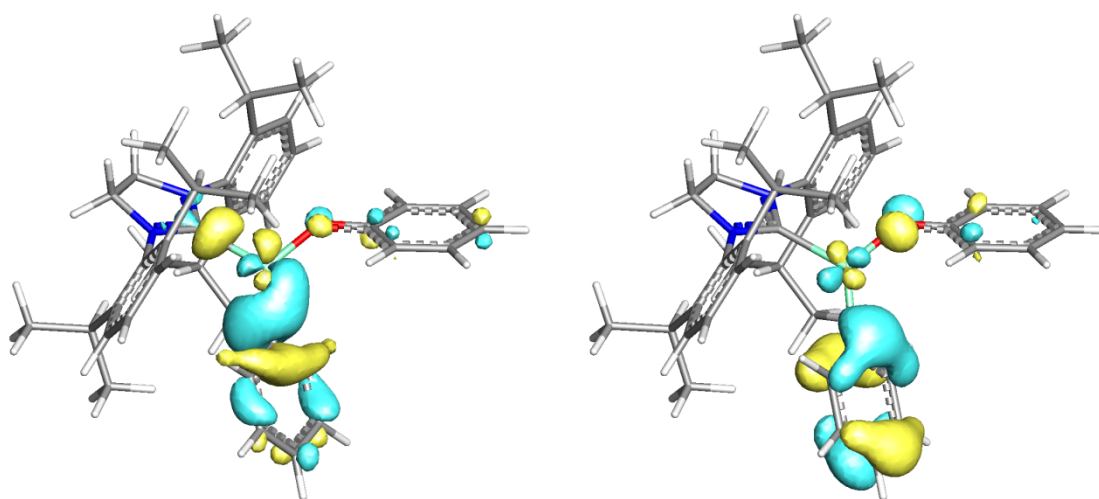

Ni  $d_{x^2-y^2}$ -based orbital

Ni  $d_{xy}$ -based orbital

**Fig. S6** Two singly occupied molecular orbitals (SOMOs) of **IN2<sub>T</sub>**.

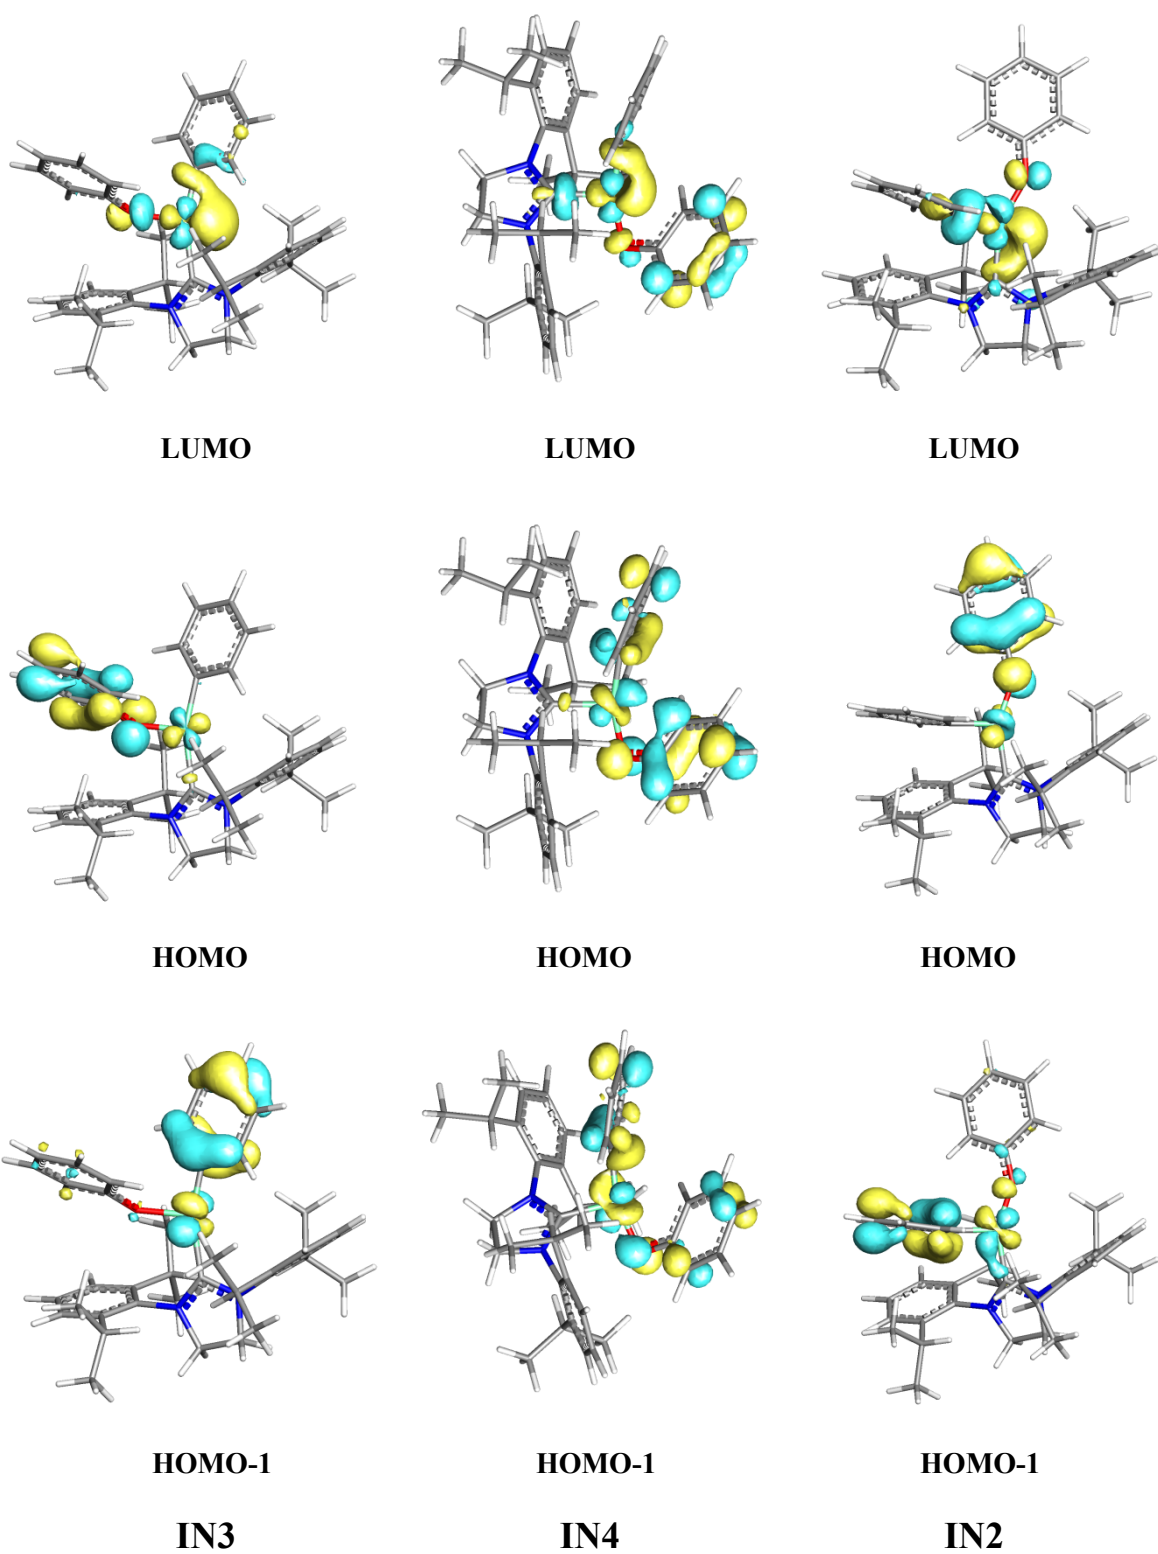

**Fig. S7** Selected molecular orbitals of IN3, IN4 and IN2.

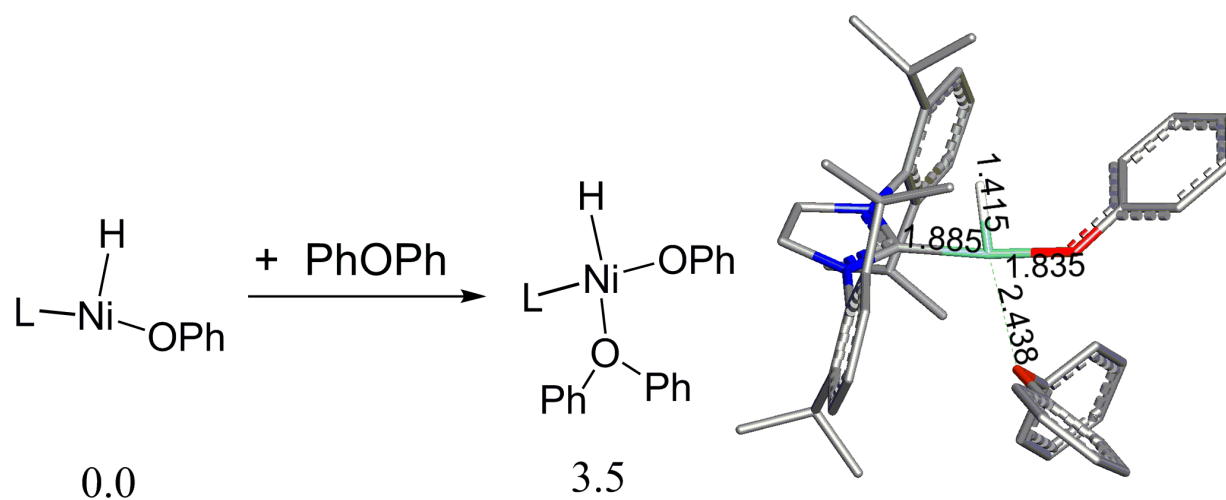

**Fig. S8** Diphenyl ether coordination to Ni(SIPr)(H)(OPh) to form Ni(SIPr)(H)(OPh)(OPh<sub>2</sub>). Relative solvent corrected free energies in *m*-xylene are given in kcal/mol. The optimized geometry of Ni(SIPr)(H)(OPh)(OPh<sub>2</sub>) is presented and the selected bond distances are shown in Å.

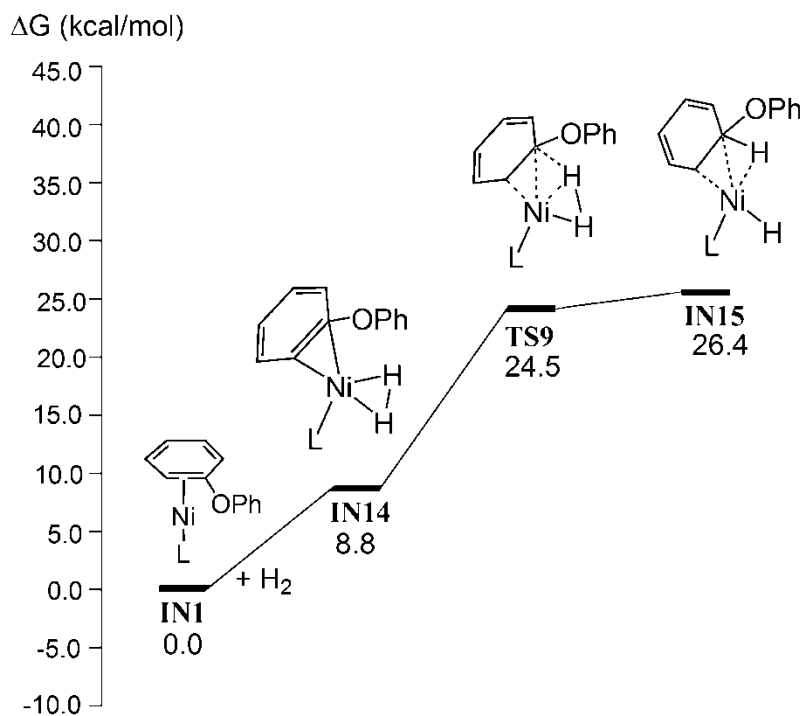

**Fig. S9** Relative free energy profiles for the C-O bond hydrogenolysis of diphenyl ether *via* H<sub>2</sub> binding on IN1. Solvent corrected relative free energies in *m*-xylene are given in kcal/mol.

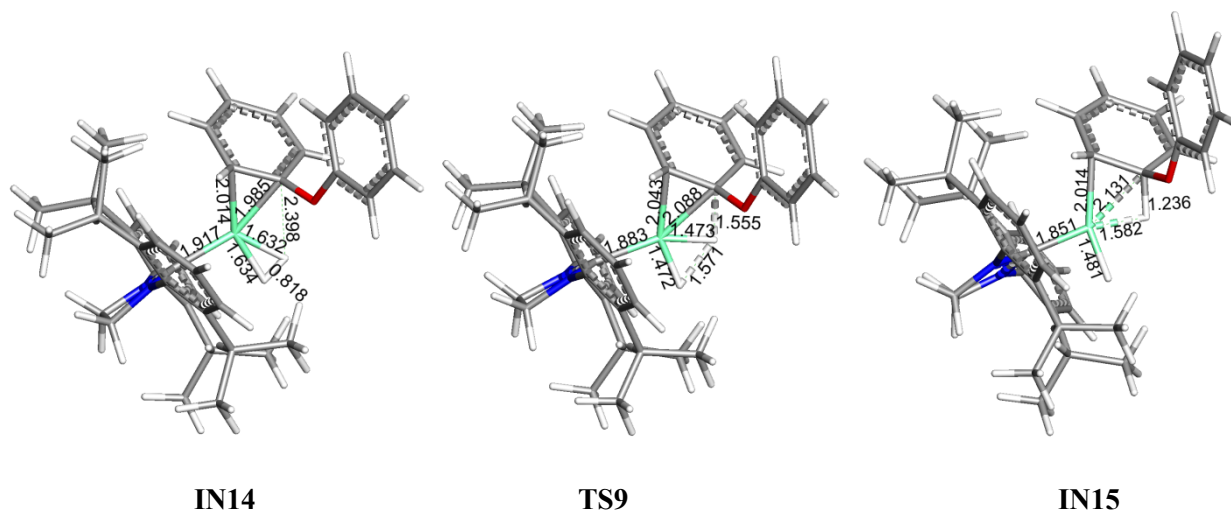

**Fig.S10** Optimized geometries of IN14, TS9, and IN15. Calculated bond distances are shown in Å.

## Nickel Hydride Pathway

We calculated the binding of H<sub>2</sub> to **IN1** to form an H<sub>2</sub>-complex Ni(SIPr)(*η*<sup>2</sup>-PhOPh)(H<sub>2</sub>), **IN14**, (Fig. S9). Generally, the dihydride mononuclear Ni complex is unstable<sup>36</sup>, while the H<sub>2</sub> adducts of Ni complexes are observable and can undergo heterolytic cleavage assisted by an amine base.<sup>37, 38</sup> The nickel hydride pathway should involve *tert*-butoxide in abstracting a proton from **IN14** to generate the Ni-H species. Thus, the deprotonation of **IN14** by *tert*-butoxide base was investigated. However, sterical hindrance from the ligands around the Ni atom prevented *tert*-butoxide access to abstract the proton. To the best of our knowledge, currently there is no experimental support for the formation of nickel hydride intermediates under these reaction conditions. Therefore, we exclude the nickel hydride pathway in this study.

Alternatively, **IN14** can undergo H-transfer from Ni to the adjacent carbon of diphenyl ether *via* **TS9** (Fig. S9). **IN15** is subsequently formed, containing a CH agostic interaction with the Ni (Fig. S10). Although the energy barrier for H-transfer *via* **TS9** is relatively similar to that of the oxidative addition of PhOPh *via* **TS1** (24-26 kcal/mol), the transition state for the O-H bond formation process was not found. Moreover, analogous to **TS8** in the hydrogenation of benzene, the second H-transfer in **IN15** to form C<sub>6</sub>H<sub>7</sub>OPh is expected to proceed *via* a transition state with a high energy barrier. Therefore, the mechanism beyond **IN15** was not explored further.



**Table S1.** Relative electronic energies, enthalpies, gas-phase free energies, free energies with solvent correction at 1 atm, and free energies with solvent correction at 1 M (in kcal/mol) for C-O bond hydrogenolysis of diphenyl ether. The gas phase geometry structures were optimized by B3LYP/BS1. The solvent correction free energies were calculated by M06/BS2 in *m*-xylene.

|                                                                                          | Relative Energy (kcal/mol) |                         |                                       |                                       |                                     |
|------------------------------------------------------------------------------------------|----------------------------|-------------------------|---------------------------------------|---------------------------------------|-------------------------------------|
|                                                                                          | B3LYP/BS1                  |                         |                                       | M06/BS2                               |                                     |
|                                                                                          | $\Delta E_{\text{elec}}$   | $\Delta H_{\text{gas}}$ | $\Delta G_{\text{gas}} (1\text{atm})$ | $\Delta G_{\text{sol}} (1\text{atm})$ | $\Delta G_{\text{sol}} (1\text{M})$ |
| <b>(a) The oxidative addition</b>                                                        |                            |                         |                                       |                                       |                                     |
| IN1 + PhOPh + H <sub>2</sub>                                                             | 0.0                        | 0.0                     | 0.0                                   | 0.0                                   | 0.0                                 |
| TS1 + PhOPh + H <sub>2</sub>                                                             | 17.5                       | 16.5                    | 18.9                                  | 24.0                                  | 24.0                                |
| IN2 + PhOPh + H <sub>2</sub>                                                             | -16.9                      | -16.5                   | -16.0                                 | -5.2                                  | -5.2                                |
| IN3 + PhOPh + H <sub>2</sub>                                                             | -3.9                       | -3.9                    | -4.1                                  | 8.3                                   | 8.3                                 |
| IN4 + PhOPh + H <sub>2</sub>                                                             | -14.5                      | -14.2                   | -10.4                                 | -6.8                                  | -6.8                                |
| <b>(b) The <math>\sigma</math>-Complex-Assisted Metathesis (<math>\sigma</math>-CAM)</b> |                            |                         |                                       |                                       |                                     |
| IN5 + PhOPh                                                                              | -12.3                      | -9.6                    | 1.4                                   | 2.5                                   | 0.7                                 |
| TS2 + PhOPh                                                                              | -0.9                       | 0.3                     | 11.5                                  | 16.0                                  | 14.1                                |
| IN7 + PhOPh                                                                              | -12.5                      | -9.5                    | 2.2                                   | 3.7                                   | 1.8                                 |
| TS4 + PhOPh                                                                              | 0.9                        | 2.2                     | 14.3                                  | 17.0                                  | 15.2                                |
| IN8 + PhOPh + PhOH                                                                       | -8.1                       | -5.3                    | -10.1                                 | 1.7                                   | 1.7                                 |
| IN6 + PhOPh                                                                              | -10.7                      | -7.7                    | 1.9                                   | 5.5                                   | 3.6                                 |
| TS3 + PhOPh                                                                              | -9.6                       | -8.0                    | 2.2                                   | 4.9                                   | 3.0                                 |
| IN9 + PhOPh + PhH                                                                        | -34.9                      | -31.7                   | -35.4                                 | -15.7                                 | -15.7                               |
| <b>(c) The reductive elimination</b>                                                     |                            |                         |                                       |                                       |                                     |
| TS5 + PhOPh + PhOH                                                                       | -5.6                       | -3.9                    | -8.2                                  | 1.2                                   | 1.2                                 |
| TS6 + PhOPh + PhH                                                                        | -8.9                       | -7.4                    | -12.2                                 | 3.7                                   | 3.7                                 |
| IN1 + PhOH + PhH                                                                         | -21.8                      | -17.3                   | -20.0                                 | -20.3                                 | -18.4                               |

**Table S2.** Relative electronic energies, enthalpies, gas-phase free energies, free energies with solvent correction at 1 atm, and free energies with solvent correction at 1 M (in kcal/mol) for hydrogenation of benzene. The gas phase geometry structures were optimized by B3LYP/BS1. The solvent correction free energies were calculated by M06/BS2 in *m*-xylene.

|                                                                                                      | Relative Energy (kcal/mol) |                         |                                       |                                       |                                     |
|------------------------------------------------------------------------------------------------------|----------------------------|-------------------------|---------------------------------------|---------------------------------------|-------------------------------------|
|                                                                                                      | B3LYP/BS1                  |                         |                                       | M06/BS2                               |                                     |
|                                                                                                      | $\Delta E_{\text{elec}}$   | $\Delta H_{\text{gas}}$ | $\Delta G_{\text{gas}} (1\text{atm})$ | $\Delta G_{\text{sol}} (1\text{atm})$ | $\Delta G_{\text{sol}} (1\text{M})$ |
| Ni(SIPr)( $\eta^6$ -C <sub>6</sub> H <sub>6</sub> ) + H <sub>2</sub> + C <sub>6</sub> H <sub>6</sub> | 2.0                        | 2.0                     | 4.0                                   | 0.0                                   | 0.0                                 |
| IN10 + H <sub>2</sub> + C <sub>6</sub> H <sub>6</sub>                                                | 0.0                        | 0.0                     | 0.0                                   | 0.0                                   | 0.0                                 |
| IN11 + C <sub>6</sub> H <sub>6</sub>                                                                 | 0.0                        | 1.9                     | 13.1                                  | 8.4                                   | 6.5                                 |
| TS7 + C <sub>6</sub> H <sub>6</sub>                                                                  | 12.8                       | 13.7                    | 26.3                                  | 27.0                                  | 25.1                                |
| IN12 + C <sub>6</sub> H <sub>6</sub>                                                                 | 12.0                       | 14.7                    | 27.0                                  | 26.4                                  | 24.5                                |
| TS8 + C <sub>6</sub> H <sub>6</sub>                                                                  | 27.0                       | 28.9                    | 38.6                                  | 40.9                                  | 39.0                                |
| IN13 + C <sub>6</sub> H <sub>6</sub>                                                                 | -7.3                       | -1.2                    | 9.1                                   | 5.7                                   | 3.8                                 |
| IN10 + C <sub>6</sub> H <sub>8</sub>                                                                 | 1.2                        | 6.9                     | 14.8                                  | 9.1                                   | 7.2                                 |
